# Supplementary material for: Position-specific binding of FUS to nascent RNA regulates mRNA length
Source: PubMed Central journal article supplement — Genes Dev. 2015 May 15;29(10):1045–57. doi: 10.1101/gad.255737.114 (PMC4441052; doi:10.1101/gad.255737.114), 2015-05-15
Supplement: supp_29.10.1045_Supplemental_Table_S1.pdf [file supp_29.10.1045_Supplemental_Table_S1.pdf]

**Supplemental Table S1. Gene Ontology analysis using the GOTERM\_BP5 dataset with DAVID.**

| GO ID                         | GOTERM_BP5                                           | <i>p</i> -value |
|-------------------------------|------------------------------------------------------|-----------------|
| <b><i>PolyA site</i></b>      |                                                      |                 |
| GO:0031644                    | Regulation of neurological system process*           | 6.99E-04        |
| GO:0051969                    | Regulation of transmission of nerve impulse*         | 7.59E-04        |
| GO:0050804                    | Regulation of synaptic transmission*                 | 1.02E-03        |
| GO:0016568                    | Chromatin modification                               | 1.74E-03        |
| GO:0043271                    | Negative regulation of ion transport                 | 3.81E-03        |
| <b><i>TSS</i></b>             |                                                      |                 |
| GO:0031328                    | Positive regulation of cellular biosynthetic process | 4.56E-04        |
| GO:0009891                    | Positive regulation of biosynthetic process          | 4.56E-04        |
| GO:0051254                    | Positive regulation of RNA metabolic process         | 5.26E-04        |
| GO:0010629                    | Negative regulation of gene expression               | 6.11E-04        |
| GO:0045893                    | Positive regulation of transcription, DNA-dependent  | 6.59E-04        |
| <b><i>Gene expression</i></b> |                                                      |                 |
| GO:0007186                    | G-protein coupled receptor protein signaling pathway | 2.32E-04        |
| GO:0006355                    | Regulation of transcription, DNA-dependent           | 2.66E-04        |
| GO:0051252                    | Regulation of RNA metabolic process                  | 3.15E-04        |
| GO:0007166                    | Cell surface receptor linked signal transduction     | 1.66E-03        |
| GO:0021510                    | Spinal cord development*                             | 2.47E-03        |

*Fus*-knockdown-mediated shifts in PolyA sites, shifts in TSSs, and changes in gene expressions are collated, respectively. Combined sets of the top and bottom 1000 genes are analyzed using the GOTERM\_BP5 dataset with DAVID. For background, 12,522 PolyA sites and 7,677 TSSs, which are detected in PolyA-seq and CAGE-seq, respectively, are used. For gene expression analysis, 571 differentially expressed genes ( $p < 0.01$ ) in the collation of 12,834 genes expressed in N2A cells (FKPM > 0.1) are similarly analyzed.

GO terms with the five best *p*-values in each category are indicated.

\*GO terms with neuron-specific functionalities.
