# Supplementary material for: Position-specific binding of FUS to nascent RNA regulates mRNA length
Source: PubMed Central journal article supplement — Genes Dev. 2015 May 15;29(10):1045–57. doi: 10.1101/gad.255737.114 (PMC4441052; doi:10.1101/gad.255737.114), 2015-05-15
Supplement: supp_29.10.1045_Supplemental_Table_S2.pdf [file supp_29.10.1045_Supplemental_Table_S2.pdf]

**Supplemental Table S2. Gene Ontology analysis using the Panther\_BP\_ALL dataset with DAVID.**

| <b>GO ID</b>                  | <b>GO_Term Panther_BP_ALL</b>                      | <b><i>p</i>-value</b> |
|-------------------------------|----------------------------------------------------|-----------------------|
| <b><i>PolyA site</i></b>      |                                                    |                       |
| BP00166                       | Neuronal activities                                | 3.83E-05              |
| BP00167                       | Synaptic transmission                              | 6.28E-04              |
| BP00193                       | Developmental processes                            | 8.14E-04              |
| BP00102                       | Signal transduction                                | 0.00469               |
| BP00120                       | Cell adhesion-mediated signaling                   | 0.0069                |
| <b><i>TSS</i></b>             |                                                    |                       |
| BP00273                       | Chromatin packaging and remodeling                 | 4.66E-07              |
| BP00133                       | Nuclear transport                                  | 0.00148               |
| BP00031                       | Nucleoside, nucleotide and nucleic acid metabolism | 0.00152               |
| BP00120                       | Cell adhesion-mediated signaling                   | 0.00458               |
| <b><i>Gene expression</i></b> |                                                    |                       |
| BP00203                       | Cell cycle                                         | 0.00017               |
| BP00282                       | Mitosis                                            | 0.00079               |
| BP00289                       | Other metabolism                                   | 0.00255               |
| BP00001                       | Carbohydrate metabolism                            | 0.00811               |

The method of DAVID analysis and the analyzed data are identical to those in Supplemental Table S1 except that the GO term dataset is Panther\_BP\_ALL.

GO terms with the *p*-values less than 0.01 are indicated.
