# Supplementary material for: Position-specific binding of FUS to nascent RNA regulates mRNA length
Source: PubMed Central journal article supplement — Genes Dev. 2015 May 15;29(10):1045–57. doi: 10.1101/gad.255737.114 (PMC4441052; doi:10.1101/gad.255737.114), 2015-05-15
Supplement: supp_29.10.1045_Supplemental_Table_S3.pdf [file supp_29.10.1045_Supplemental_Table_S3.pdf]

**Supplemental Table S3. Gene ontology analysis using the Panther\_BP\_ALL dataset of differentially expressed transcripts between primary motor neurons and primary cortical neurons.**

| <b>GO ID</b>           | <b>GO_Term Panther_BP_ALL</b>                      | <b>P-value</b> |
|------------------------|----------------------------------------------------|----------------|
| <i>PolyA site</i>      |                                                    |                |
| BP00167                | Synaptic transmission                              | 9.07E-07       |
| BP00166                | Neuronal activities                                | 1.76E-06       |
| BP00125                | Intracellular protein traffic                      | 8.51E-06       |
| BP00168                | Neurotransmitter release                           | 3.81E-05       |
| BP00127                | Regulated exocytosis                               | 2.56E-04       |
| BP00126                | Exocytosis                                         | 3.13E-04       |
| BP00136                | Other intracellular protein traffic                | 5.68E-04       |
| <i>Gene expression</i> |                                                    |                |
| BP00193                | Developmental processes                            | 4.50E-12       |
| BP00246                | Ectoderm development                               | 6.78E-09       |
| BP00274                | Cell communication                                 | 3.52E-08       |
| BP00199                | Neurogenesis                                       | 5.48E-07       |
| BP00108                | Receptor protein tyrosine kinase signaling pathway | 1.63E-06       |
| BP00102                | Signal transduction                                | 1.28E-04       |
| BP00248                | Mesoderm development                               | 1.86E-04       |
| BP00285                | Cell structure and motility                        | 1.88E-04       |
| BP00111                | Intracellular signaling cascade                    | 2.03E-04       |
| BP00201                | Skeletal development                               | 4.32E-04       |
| BP00166                | Neuronal activities                                | 7.85E-04       |
| BP00019                | Lipid, fatty acid and steroid metabolism           | 0.00183        |
| BP00064                | Protein phosphorylation                            | 0.00338        |
| BP00275                | Extracellular matrix protein-mediated signaling    | 0.00361        |
| BP00167                | Synaptic transmission                              | 0.00392        |
| BP00112                | Calcium mediated signaling                         | 0.00398        |
| BP00287                | Cell motility                                      | 0.00465        |
| BP00063                | Protein modification                               | 0.00485        |
| BP00286                | Cell structure                                     | 0.00598        |
| BP00224                | Cell proliferation and differentiation             | 0.00627        |
| BP00122                | Ligand-mediated signaling                          | 0.00744        |

One hundred and twenty-two polyA sites and 910 genes are differentially expressed (fold change > 1.8,  $p < 0.1$  by t-test) between these two cell types. GO terms with the  $p$ -values less than 0.01 are indicated.
