# Supplementary material for: Position-specific binding of FUS to nascent RNA regulates mRNA length
Source: PubMed Central journal article supplement — Genes Dev. 2015 May 15;29(10):1045–57. doi: 10.1101/gad.255737.114 (PMC4441052; doi:10.1101/gad.255737.114), 2015-05-15
Supplement: supp_29.10.1045_Supplemental_Table_S4.pdf [file supp_29.10.1045_Supplemental_Table_S4.pdf]

**Supplemental Table S4. PCR primer list**

| Analysis   | Gene          | Segment      | direction | location   | sequence                 |                        |
|------------|---------------|--------------|-----------|------------|--------------------------|------------------------|
| Expression |               |              |           |            |                          |                        |
|            | <i>Ewsr1</i>  |              | F         | alt exon 8 | AGGACACTGGGCAGTCCCCTTT   |                        |
|            |               |              | R         | alt exon 8 | GCCTTACCTGCAGCAGACTGA    |                        |
|            |               | upstream     | F         | intron 8   | CTGCTGCAGGTAAGGCGCTCAA   |                        |
|            |               |              | R         | intron 8   | ACACCGTGTCTAGTCCCCTTTTCA |                        |
|            |               | downstream   | F         | intron 8   | GCAAGCTGCCCTGAAGAAAGGCA  |                        |
|            |               |              | R         | intron 8   | TACCGCTCTGAGCCTTGGCA     |                        |
|            | <i>Zbtb24</i> |              | F         | exon 2     | CCGGTGTAAGACTGCGACA      |                        |
|            |               |              | R         | intron 2   | ACAACCGTCCCAACCACAAT     |                        |
|            | <i>RLUC</i>   |              | F         |            | TTGAGCCAGTAGCGCGGTGT     |                        |
|            |               |              | R         |            | GCACCCCAATCATGGCCGACAA   |                        |
| ChIP       |               |              |           |            |                          |                        |
|            | <i>Ewsr1</i>  | s-2          | F         | promoter   | GGCCTTGCCTCCATCCCTCAAT   |                        |
|            |               |              | R         | promoter   | TCACCCAGCAGGACCTGGGACTAT |                        |
|            |               | s-1          | F         | promoter   | AGCCAGCGGGCGTAACCATT     |                        |
|            |               |              | R         | promoter   | TCGGCTCTTCGCTCCCGAAA     |                        |
|            |               | s1           | F         | exon 1     | GCGAGAAGGAGACGGACGTTGA   |                        |
|            |               |              | R         | intron 1   | CCAACCCCTTTCGGCGACTTCA   |                        |
|            |               | s3           | F         | exon 3     | ACACCGCCCAGCCAACTCAA     |                        |
|            |               |              | R         | intron 3   | GCGTGGTGGTGCATGCCTTT     |                        |
|            |               | s6           | F         | intron 6   | TTAGGACAGGCTGGCCCTGAAC   |                        |
|            |               |              | R         | intron 6   | GCTGGGTGTAGTGGCAAGGCAA   |                        |
|            |               | s7           | F         | intron 7   | TGGCGCAGCATTTCAGTGA      |                        |
|            |               |              | R         | intron 7   | TCTGGCGTACAAAGGGCGGAA    |                        |
|            |               | s8           | F         | intron 8   | AGGACACTGGGCAGTCCCCTTT   |                        |
|            |               |              | R         | intron 8   | GCCTTACCTGCAGCAGACTGAA   |                        |
|            |               | s9           | F         | exon 9     | TGGAGAGCGAGGTGGCTTCA     |                        |
|            |               |              | R         | intron 9   | AGACAATGCCGGCAGTACCCATT  |                        |
|            |               | s11          | F         | intron 11  | TGGCAGCCTCTGTGTGTGCAA    |                        |
|            |               |              | R         | intron 11  | AGCCCCCTTCCCCAGTGAAAA    |                        |
|            |               | s13          | F         | intron 13  | AACAGCATGCGGGGAGGCAT     |                        |
|            |               |              | R         | intron 13  | CCAACCCAACCAACCCCGTTT    |                        |
|            |               | <i>Taf15</i> | s-1       | F          | promoter                 | AGGGGAGCCTCGTCTTTCGCTT |

|        |                       |     |           |                             |                            |
|--------|-----------------------|-----|-----------|-----------------------------|----------------------------|
|        |                       | R   | promoter  | TCGCTCCGCCCCATTCACAA        |                            |
|        | s1                    | F   | intron 1  | TTCCCAGTCCACCTGGAGGGAT      |                            |
|        |                       | R   | intron 1  | TGTCCCGTCTTTCTCGCTCCT       |                            |
|        | s7                    | F   | intron 7  | AGGCTAGGAGGGACACAATGGTT     |                            |
|        |                       | R   | intron 7  | ACCACACTCACACCCAACCCTCA     |                            |
|        | s8                    | F   | intron 8  | AAAGCCACCAATATCCCGCAGATG    |                            |
|        |                       | R   | intron 8  | TGCACACAACACACGAGCCTCA      |                            |
|        | s12                   | F   | intron 12 | ACTGGGTGGGTGTCAGGCATCA      |                            |
|        |                       | R   | intron 12 | TGGCAGTGAGACAACGCAGCA       |                            |
| RIP    |                       |     |           |                             |                            |
|        | <i>Ewsr1</i>          | RIP | F         | intron 8                    | GTTGTTTGGTAATGAACCAGAGGAGG |
|        |                       |     | R         | intron 8                    | GTTGCATGCAGCTTTACTCCTTGTT  |
|        | <i>RLUC</i>           | RIP | F         |                             | TCGTTTCGTTGAGCGAGTTCTCAAA  |
|        |                       |     | R         |                             | AGGGGTCCGCGCACATTTTC       |
| 3'RACE |                       |     |           |                             |                            |
|        |                       |     |           | CTGATCTAGAGGTACCGGATCCTTTTT |                            |
|        | Oligo dT              | R   |           | TTTTTTTTTTTTTT              |                            |
|        |                       |     | R         | CTGATCTAGAGGTACCGGATCC      |                            |
|        | <i>pRBG4</i>          |     | F         | TAGAAGACACCGGGACCGAT        |                            |
|        | <i>Ewsr1</i>          |     | F         | intron 8                    | CTGCTGCAGGTAAGGCGCTCAA     |
|        | <i>Zbtb24</i>         |     | F         | APA                         | CCGGTGTAAGACTGCGACA        |
|        | <i>pRL-SV40+Ewsr1</i> |     | F         |                             | TGCAGAAGTTGGTCGTGAGGCA     |
|        | <i>minigene+MS2</i>   |     | F         |                             | ATAGGCTAGCATGAACCAGAGGAGG  |

---
