# Supplementary figures and images for: Position-specific binding of FUS to nascent RNA regulates mRNA length
Source: PubMed Central journal article supplement — Genes Dev. 2015 May 15;29(10):1045–57. doi: 10.1101/gad.255737.114 (PMC4441052; doi:10.1101/gad.255737.114), 2015-05-15

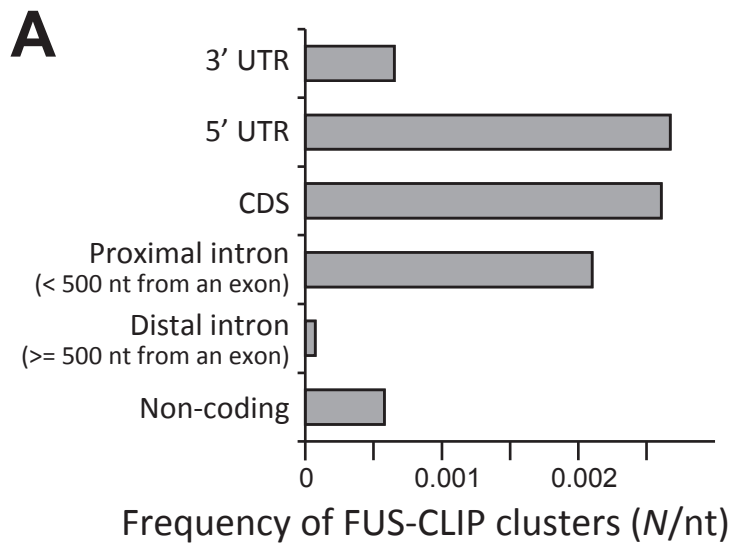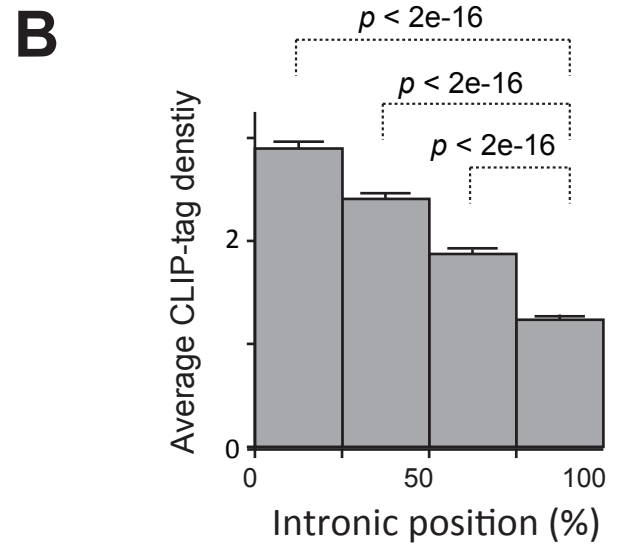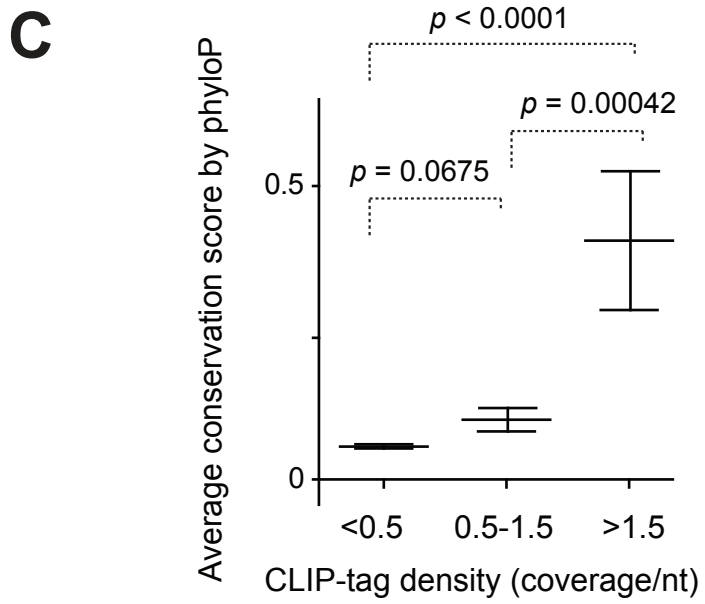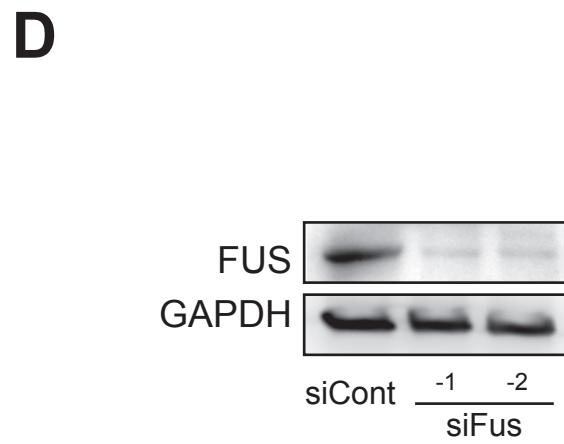

Supplement: supp_29.10.1045_Supplemental_Fig._S1.pdf [file supp_29.10.1045_Supplemental_Fig._S1.pdf]

**A**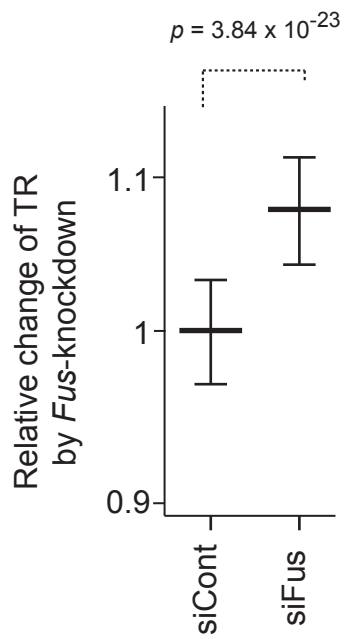**B**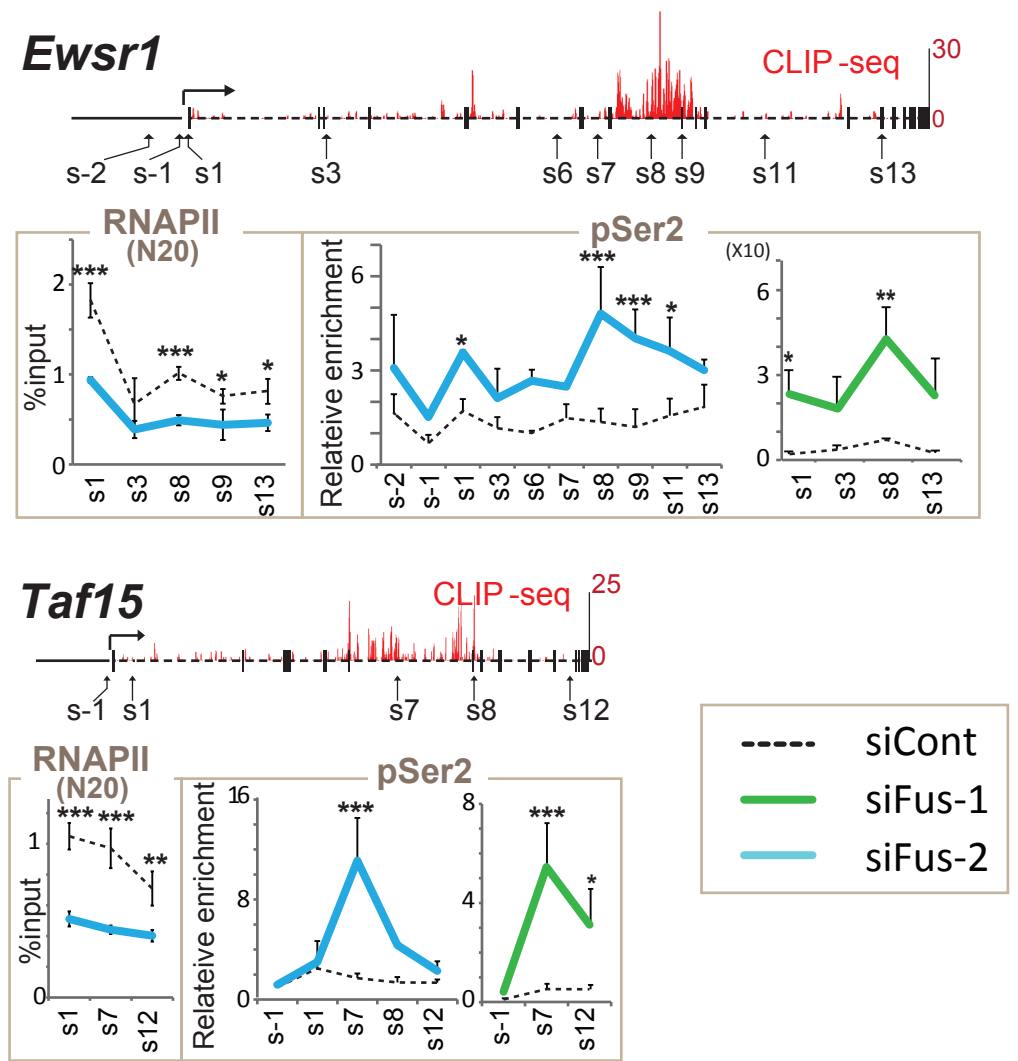

Supplement: supp_29.10.1045_Supplemental_Fig._S2.pdf [file supp_29.10.1045_Supplemental_Fig._S2.pdf]

**A CAGE****PolyA**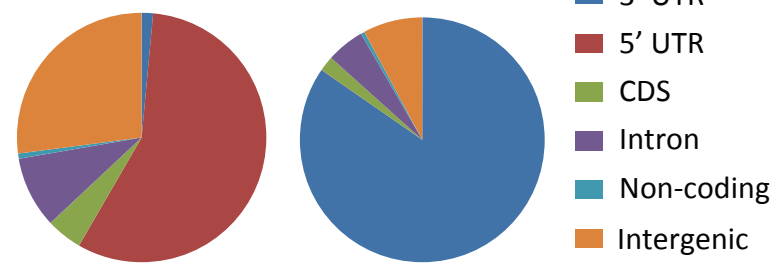**B Cluster****non-Cluster**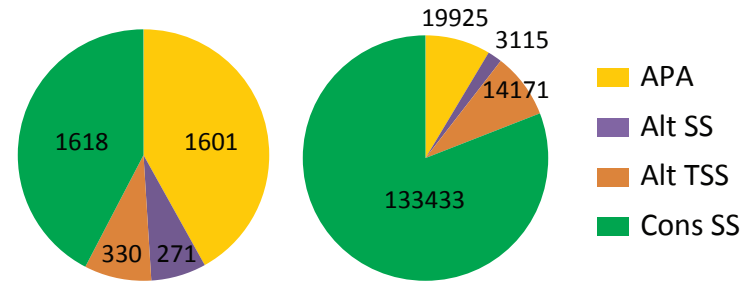**C**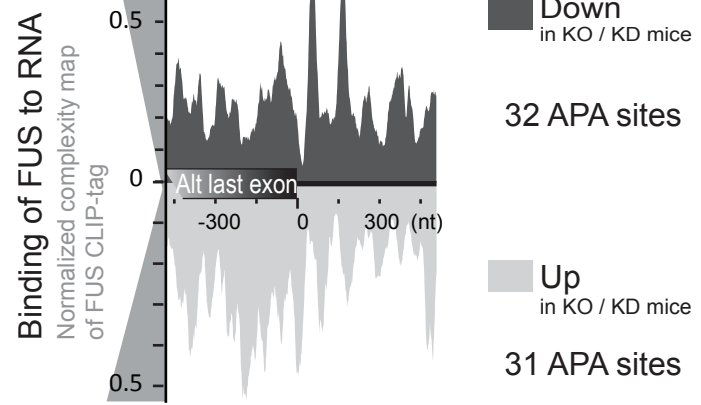**D**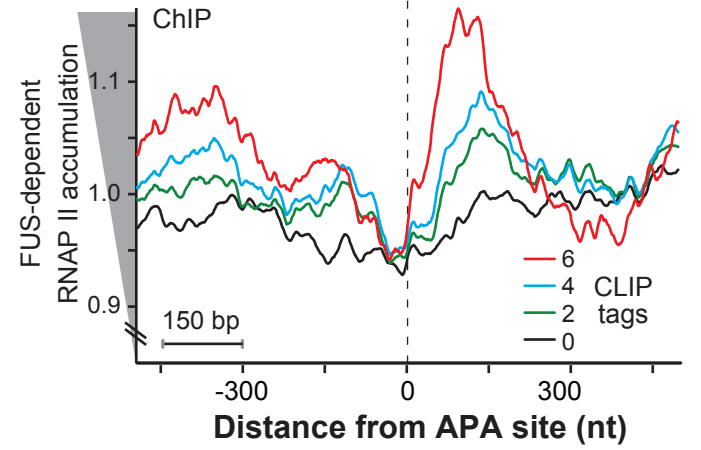**E**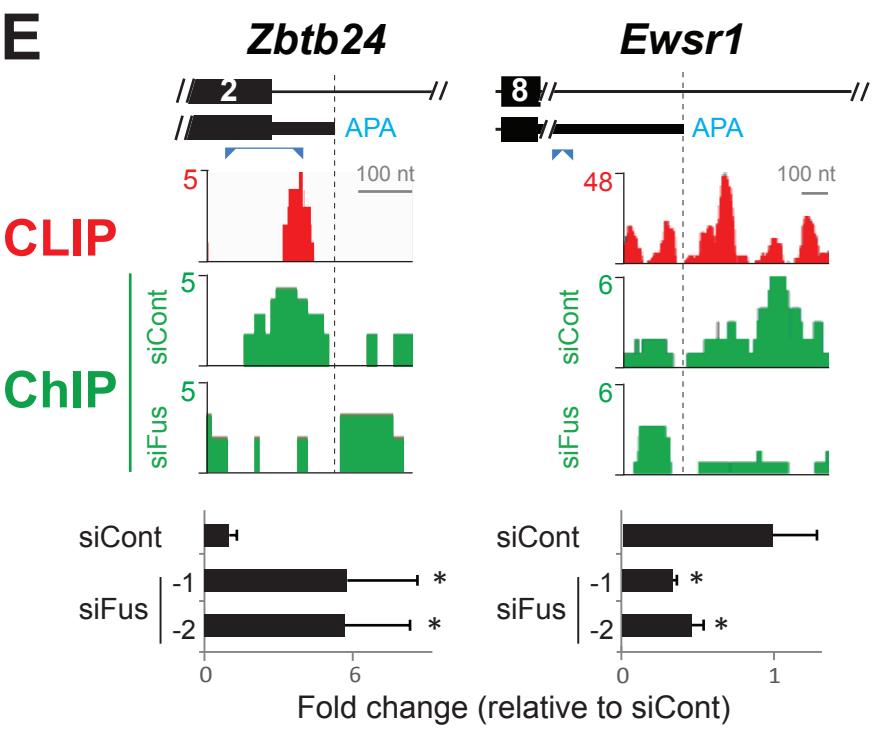**F**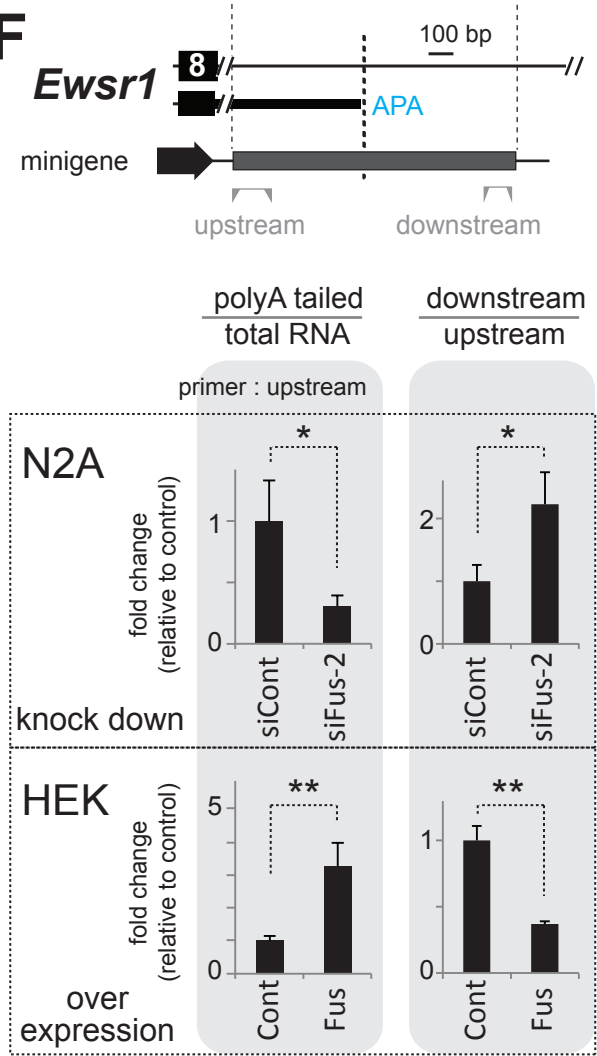**G**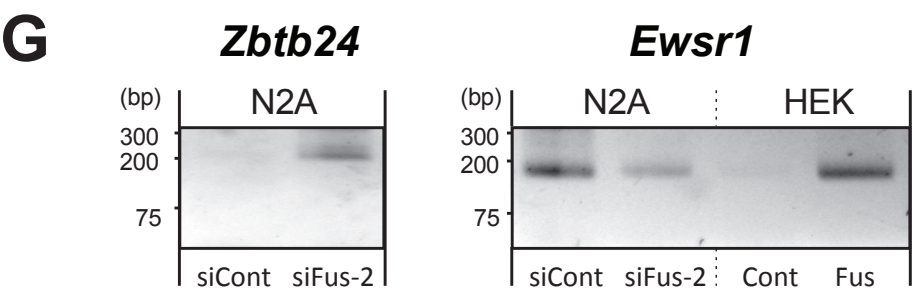**H**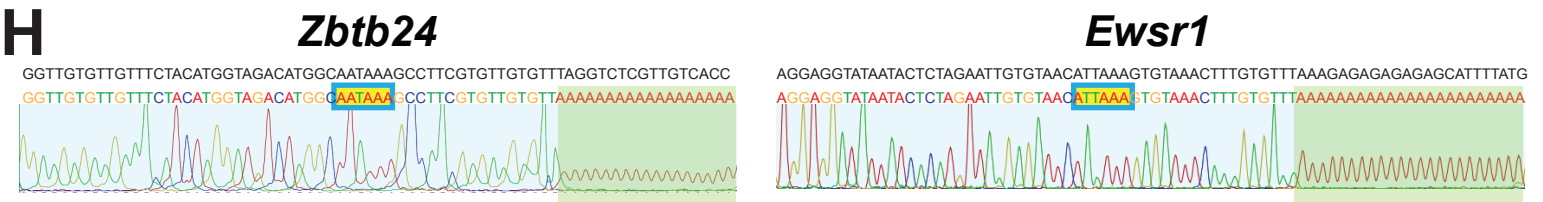

Supplement: supp_29.10.1045_Supplemental_Fig._S3.pdf [file supp_29.10.1045_Supplemental_Fig._S3.pdf]

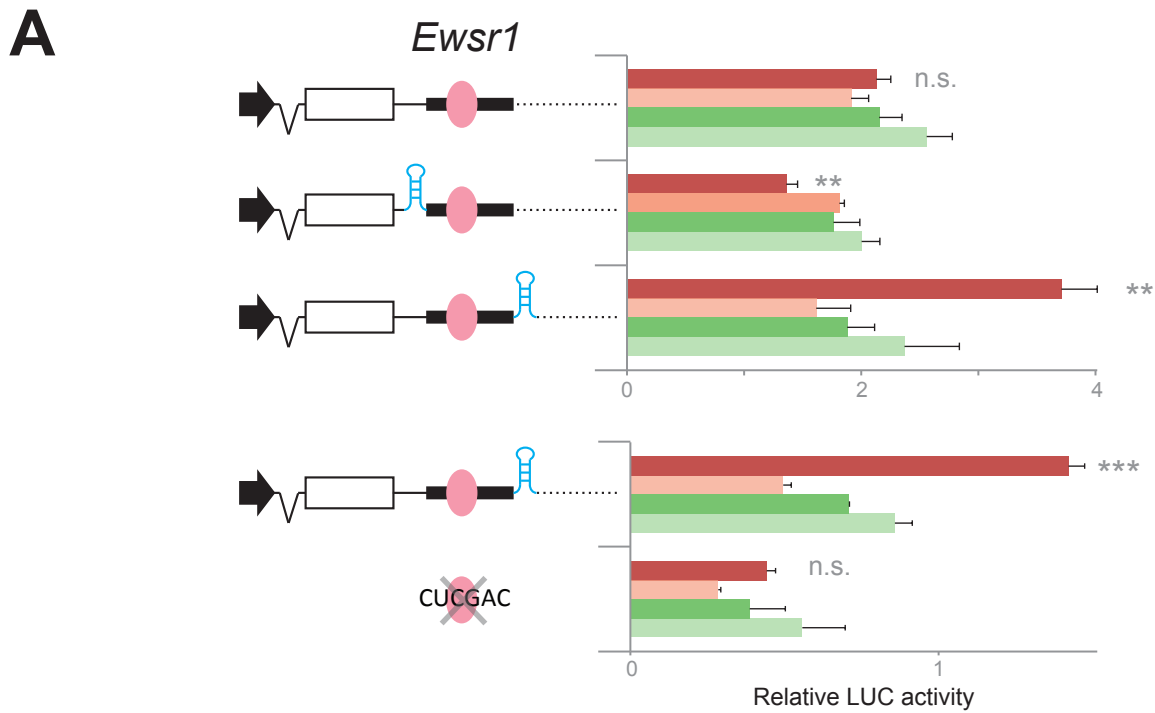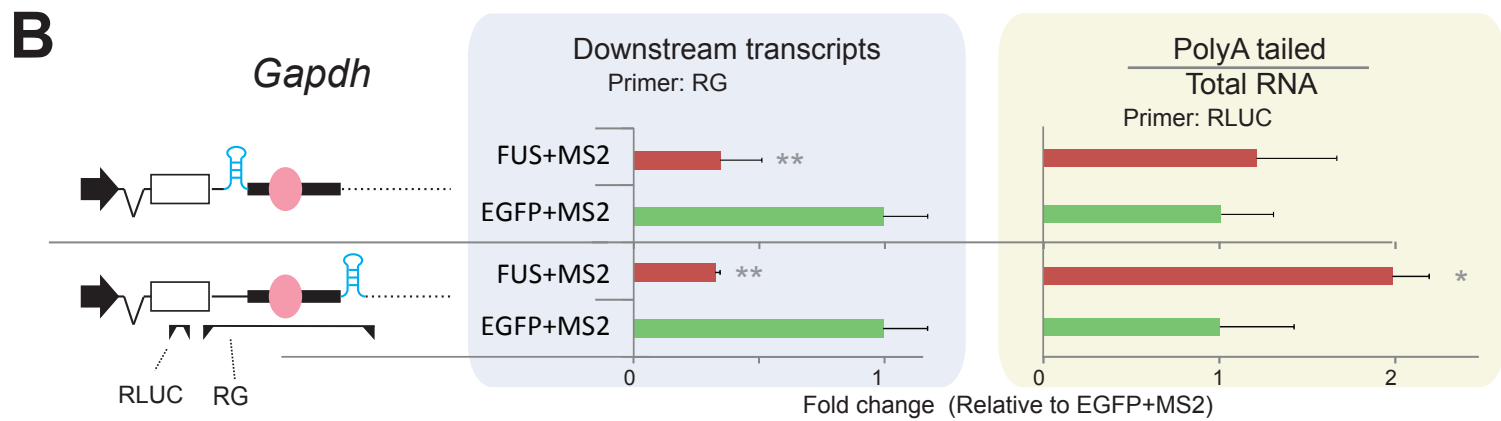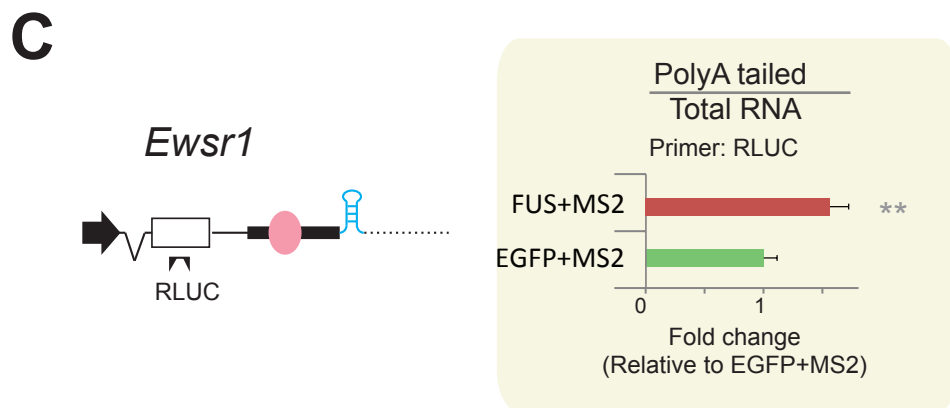

Supplement: supp_29.10.1045_Supplemental_Fig._S4.pdf [file supp_29.10.1045_Supplemental_Fig._S4.pdf]

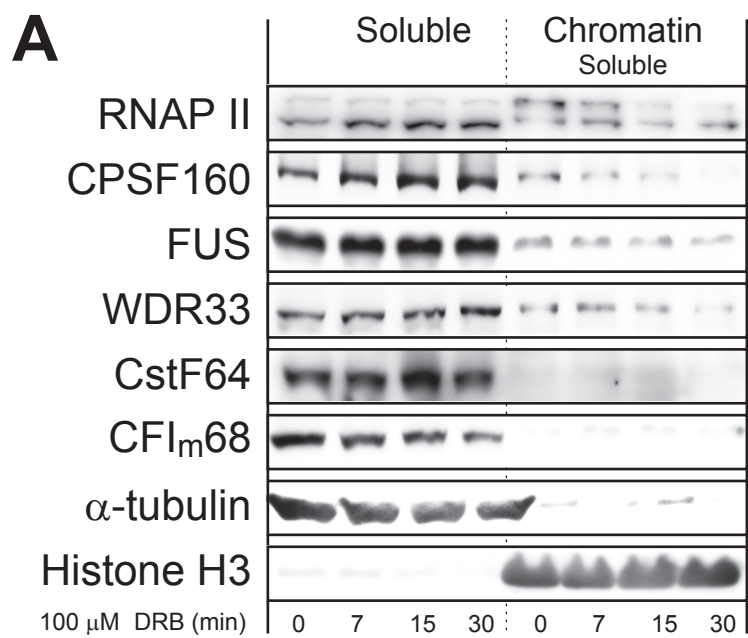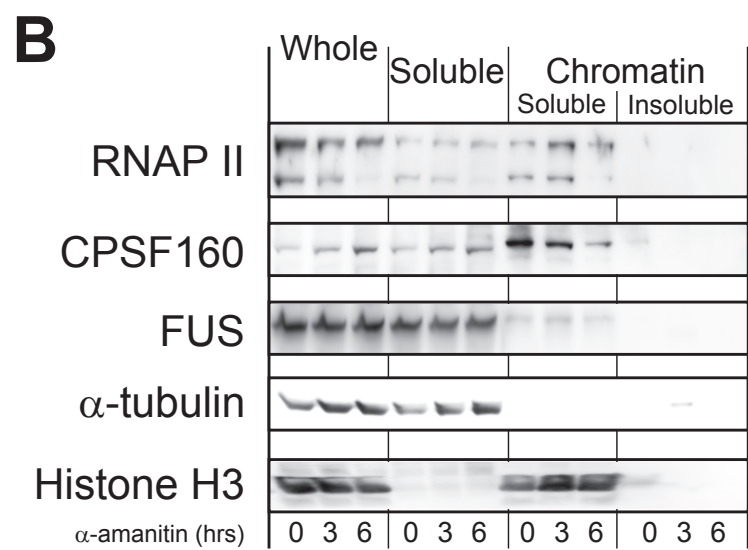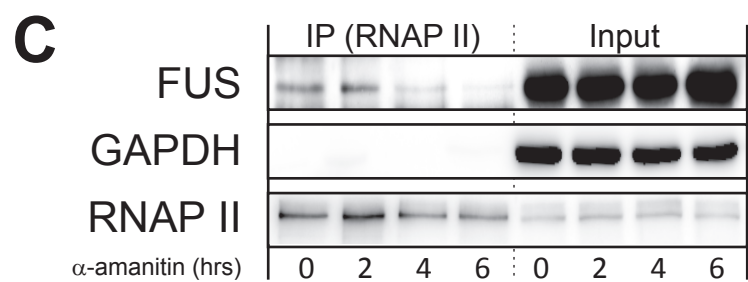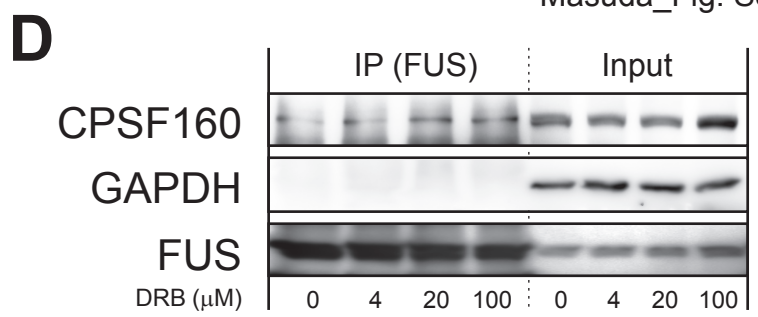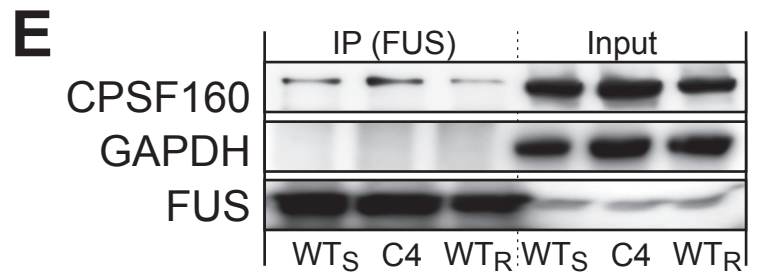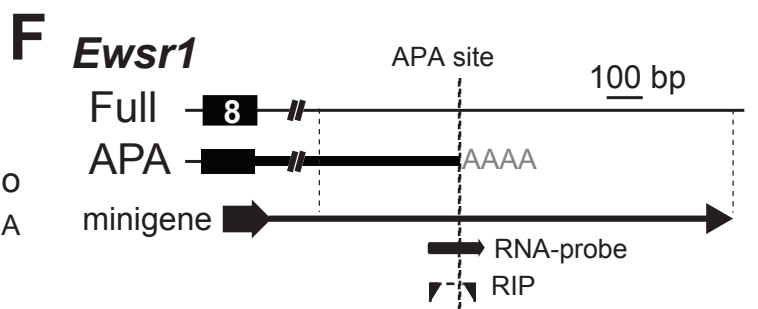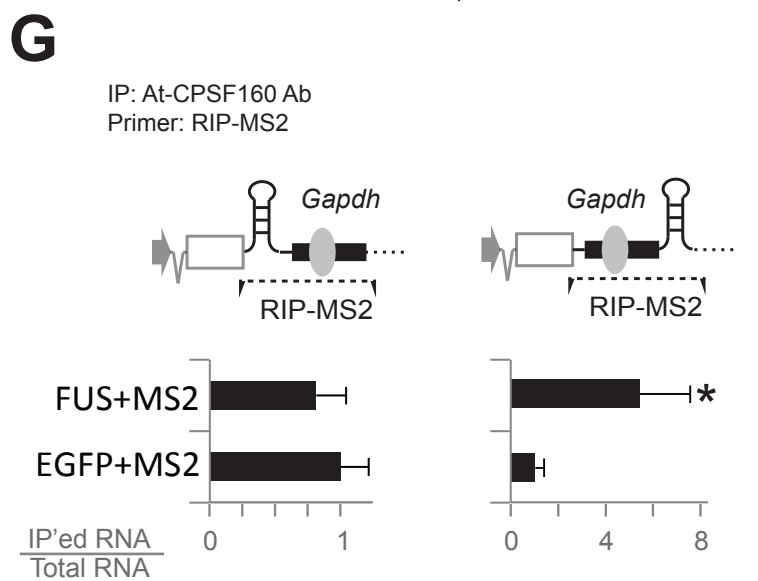

Supplement: supp_29.10.1045_Supplemental_Fig._S5.pdf [file supp_29.10.1045_Supplemental_Fig._S5.pdf]

**A**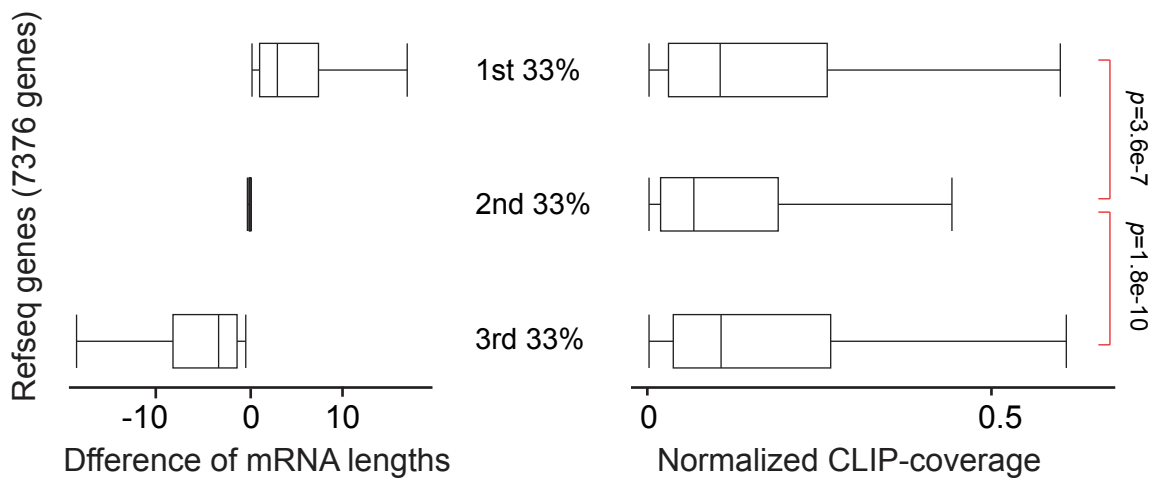**B**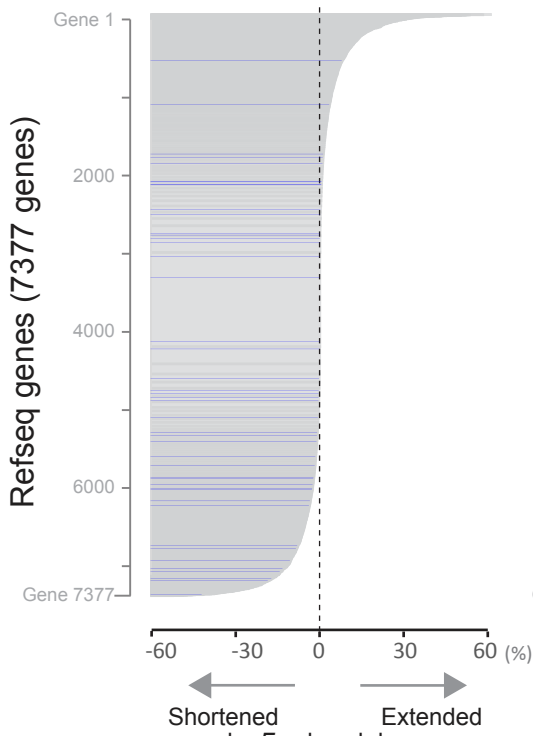

Difference of fractional mRNA lengths

**C**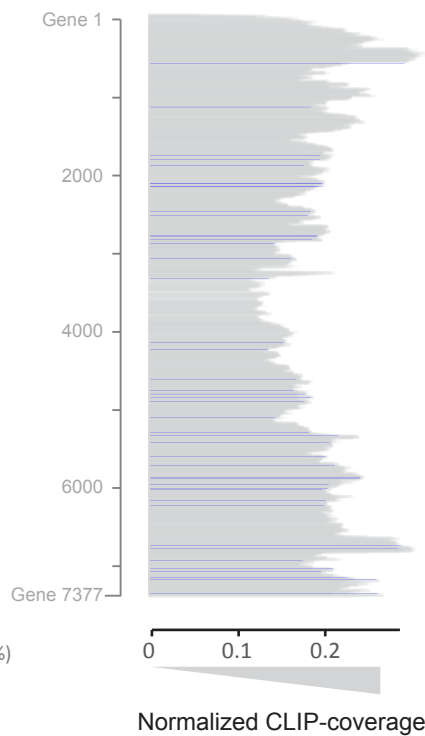

Binding of FUS to RNA

**D**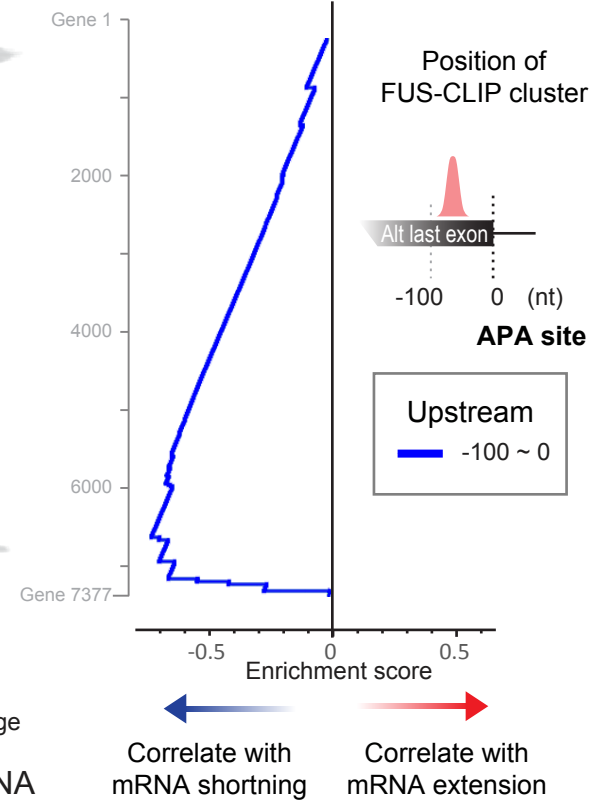**E**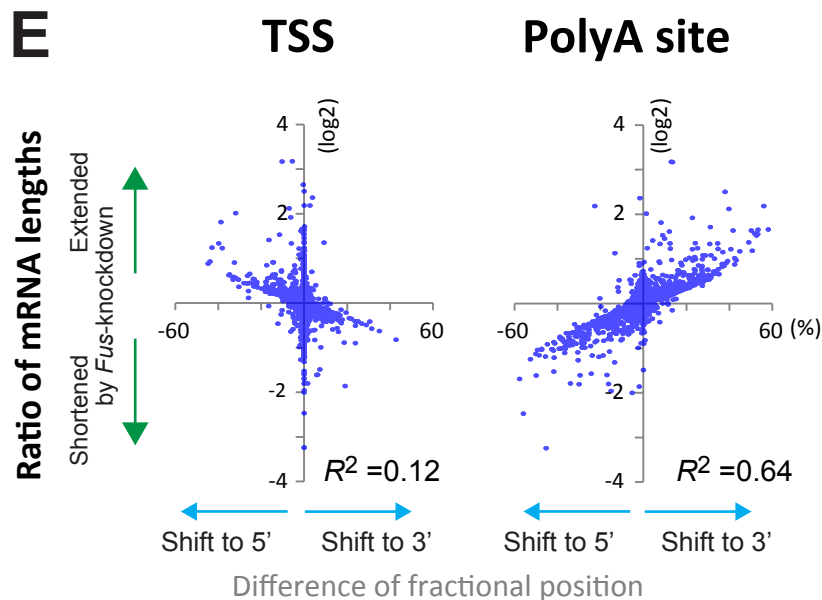**F**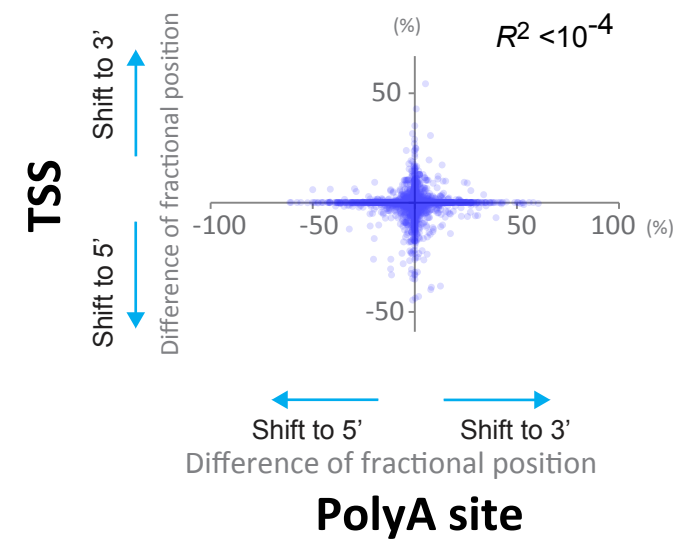

Supplement: supp_29.10.1045_Supplemental_Fig._S6.pdf [file supp_29.10.1045_Supplemental_Fig._S6.pdf]
